# Supplementary material
Source: HighWire-hosted journal article supplement (https://fmch.bmj.com/content/11/3/e002251)
Supplement: inline-supplementary-material-2 [file inline-supplementary-material-2.pdf]

1 **Supplementary Table 2: Characteristics associated with ACVRa being performed for**  
 2 **problems/diagnoses for which an ACVRa is appropriate**

3

| Factor group      | Covariate                                | Class            | ACVRa performed (high risk pttts) |            | p      |
|-------------------|------------------------------------------|------------------|-----------------------------------|------------|--------|
|                   |                                          |                  | No                                | Yes        |        |
| Patient factors   | Patient age group                        | <55 years        | 2224 (24%)                        | 334 (27%)  | <0.001 |
|                   |                                          | 55-64 years      | 2609 (28%)                        | 405 (33%)  |        |
|                   |                                          | 65-74 years      | 2442 (27%)                        | 325 (26%)  |        |
|                   |                                          | 75+ years        | 1881 (21%)                        | 164 (13%)  |        |
|                   | Patient gender                           | Male             | 4273 (47%)                        | 632 (52%)  | 0.012  |
|                   |                                          | Female           | 4751 (53%)                        | 583 (48%)  |        |
|                   | Aboriginal and/or Torres Strait Islander | No               | 8974 (98%)                        | 1185 (96%) | 0.008  |
|                   |                                          | Yes              | 182 (2%)                          | 43 (4%)    |        |
|                   | Non-English-Speaking Background          | No               | 8184 (90%)                        | 1085 (88%) | 0.95   |
|                   |                                          | Yes              | 953 (10%)                         | 141 (12%)  |        |
|                   | Patient/practice status                  | Existing patient | 4097 (45%)                        | 731 (60%)  | <0.001 |
|                   |                                          | New to registrar | 4544 (50%)                        | 462 (38%)  |        |
| New to practice   |                                          | 505 (6%)         | 26 (2%)                           |            |        |
| Registrar factors | Registrar gender                         | Male             | 3817 (42%)                        | 533 (43%)  | 0.63   |
|                   |                                          | Female           | 5339 (58%)                        | 695 (57%)  |        |
|                   | Registrar FT or PT <sup>1</sup>          | Part-time        | 1868 (21%)                        | 240 (20%)  | 0.188  |
|                   |                                          | Full-time        | 6981 (79%)                        | 936 (80%)  |        |
|                   | Training term                            | Term 1           | 3460 (38%)                        | 494 (40%)  | 0.99   |
|                   |                                          | Term 2           | 3900 (43%)                        | 523 (43%)  |        |
|                   |                                          | Term 3           | 1796 (20%)                        | 211 (17%)  |        |
|                   | Worked at practice previously            | No               | 6828 (75%)                        | 946 (77%)  | 0.94   |
|                   |                                          | Yes              | 2282 (25%)                        | 281 (23%)  |        |

<sup>1</sup> Full-time or part-time

| Factor group          | Covariate                        | Class         | ACVRA performed (high risk pts) |             | p         |
|-----------------------|----------------------------------|---------------|---------------------------------|-------------|-----------|
|                       |                                  |               | No                              | Yes         |           |
| Practice factors      | Qualified as doctor in Australia | No            | 1607 (18%)                      | 284 (23%)   | 0.085     |
|                       |                                  | Yes           | 7548 (82%)                      | 944 (77%)   |           |
|                       | Registrar age                    | mean (SD)     | 32.3 (6.2)                      | 33.5 (7.2)  | 0.165     |
|                       | Years worked                     | mean (SD)     | 3.2 (2.7)                       | 3.7 (4.2)   | 0.148     |
|                       | Practice size                    | Small         | 4215 (48%)                      | 506 (43%)   | 0.30      |
|                       |                                  | Large         | 4605 (52%)                      | 666 (57%)   |           |
|                       | Practice routinely bulk bills    | No            | 6017 (66%)                      | 735 (60%)   | 0.137     |
|                       |                                  | Yes           | 3106 (34%)                      | 490 (40%)   |           |
|                       | Rurality                         | Major city    | 5021 (57%)                      | 658 (56%)   | 0.22      |
|                       |                                  |               | Inner regional                  | 2528 (29%)  |           |
| Outer regional remote |                                  |               | 1259 (14%)                      | 153 (13%)   |           |
| Region                | Region 1                         | 1890 (21%)    | 193 (16%)                       | 0.027       |           |
|                       |                                  | Region 2      | 778 (8%)                        |             | 103 (8%)  |
|                       |                                  | Region 3      | 2365 (26%)                      |             | 332 (27%) |
|                       |                                  | Region 4      | 2663 (29%)                      |             | 330 (27%) |
|                       |                                  | Region 5      | 1460 (16%)                      |             | 270 (22%) |
| Consultation factors  | SEIFA <sup>2</sup> index decile  | mean (SD)     | 5.1 (2.9)                       | 5.2 (3.0)   | 0.43      |
|                       | New problem seen                 | No            | 6561 (77%)                      | 849 (73%)   | <0.001    |
|                       |                                  | Yes           | 1916 (23%)                      | 320 (27%)   |           |
|                       | Sought help any source           | None          | 8221 (90%)                      | 947 (77%)   | <0.001    |
|                       |                                  | Supervisor    | 335 (4%)                        | 63 (5%)     |           |
|                       |                                  | Other sources | 600 (7%)                        | 218 (18%)   |           |
|                       | Consultation duration            | mean (SD)     | 20.2 (10.7)                     | 22.2 (11.2) | <0.001    |
|                       | Number of problems               | mean (SD)     | 2.6 (1.0)                       | 2.6 (1.0)   | 0.77      |
|                       | Follow-up ordered                | None          | 5029 (55%)                      | 518 (42%)   | <0.001    |

<sup>2</sup> Socio-Economic Indexes for Areas

| Factor group | Covariate                | Class                    | ACVRa performed (high risk pts) |            | p      |
|--------------|--------------------------|--------------------------|---------------------------------|------------|--------|
|              |                          |                          | No                              | Yes        |        |
|              |                          | With themselves          | 3520 (38%)                      | 650 (53%)  |        |
|              |                          | Other GP in the practice | 607 (7%)                        | 60 (5%)    |        |
|              | Pathology ordered        | No                       | 6636 (72%)                      | 918 (75%)  | 0.047  |
|              |                          | Yes                      | 2520 (28%)                      | 310 (25%)  |        |
|              | Referral ordered         | No                       | 8637 (94%)                      | 1109 (90%) | 0.0002 |
|              |                          | Yes                      | 519 (6%)                        | 119 (10%)  |        |
|              | Medication prescribed    | No                       | 5296 (58%)                      | 731 (60%)  | 0.31   |
|              |                          | Yes                      | 3860 (42%)                      | 497 (40%)  |        |
|              | Learning goals generated | No                       | 7360 (88%)                      | 820 (75%)  | <0.001 |
|              |                          | Yes                      | 967 (12%)                       | 279 (25%)  |        |

4
